# Supplementary material
Source: publisher figshare collection journal article supplement (https://acs.figshare.com/ndownloader/files/3846568)
Supplement: Supplementary file 1 [file 3846568]

## Supporting Information for

### **UV disinfection induces a VBNC state in *Escherichia coli* and *Pseudomonas aeruginosa***

Shenghua Zhang, Chongsong Ye, Huirong Lin, Lu Lv, Xin Yu\*

Institute of Urban Environment, Chinese Academy of Science, Xiamen, 361021, P R China

\* Corresponding Author. Phone & Fax: +86-592-6190780; Email: [xyu@iue.ac.cn](mailto:xyu@iue.ac.cn)

Number of pages: 2

Number of figures: 2

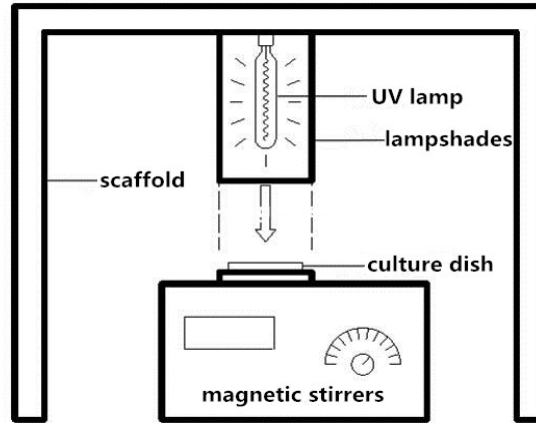

Figure S1. Bench scale collimated beam apparatus of UV-C radiation on bacteria

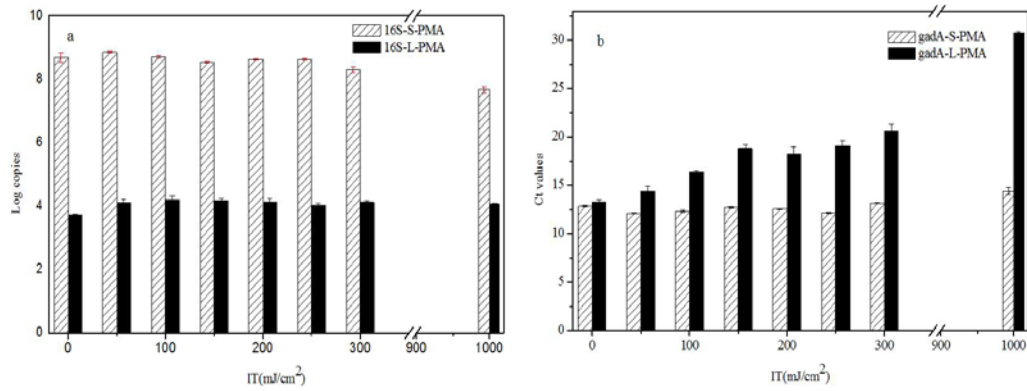

Figure S2. a: Log copies of long/short 16S gene fragments with PMA pretreatment of *E.coli* under different UV dose based on qPCR; b: Ct values of long/short *gadA* gene fragments with PMA pretreatment of *E.coli* under different UV dose based on qPCR. The product of I (UV radiation intensity,  $\mu\text{W}\cdot\text{cm}^{-2}$ ) and T (UV radiation time, S) is the UV dose. The error bars represent  $\pm\text{SE}$ .
